# Supplementary material for: Identification of a Group’s Physiological Synchronization with Earth’s Magnetic Field
Source: MDPI journal article supplement (doi:10.3390/ijerph14090998), 2017-09-01

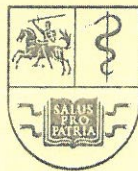

## KAUNO REGIONINIS BIOMEDICININIŲ TYRIMŲ ETIKOS KOMITETAS

Lietuvos sveikatos mokslų universitetas, A. Mickevičiaus g. 9, LT 44307 Kaunas, tel. (+370) 37 32 68 89; el.paštas: kaunorbtek@ismuni.lt

### LEIDIMAS ATLIKTI BIOMEDICININĮ TYRIMĄ

2015-12-23 Nr. BE-2-51

|                                                                                                                                   |                                         |
|-----------------------------------------------------------------------------------------------------------------------------------|-----------------------------------------|
| Biomedicininio tyrimo pavadinimas: "Psichofiziologinių žmogaus parametrų sąsajos su žemės magnetinio lauko svyravimais Lietuvoje" |                                         |
| Protokolo Nr.:                                                                                                                    | Joffè-Vain-1                            |
| Data:                                                                                                                             | 2015-12-16                              |
| Versija:                                                                                                                          | 2                                       |
| Asmens informavimo forma                                                                                                          | Versija 2, 2015-12-16                   |
| Pagrindinis tyrėjas:                                                                                                              | Prof. habil. dr. Alfonsas Vainoras      |
| Biomedicininio tyrimo vieta:                                                                                                      | Lietuvos sveikatos mokslų universitetas |
| Įstaigos pavadinimas:                                                                                                             | Sveikatos tyrimų institutas             |
| Adresas:                                                                                                                          | Betonuotojų g. 4, Kaunas                |

Išvada:

Kauno regioninio biomedicininio tyrimų etikos komiteto posėdžio, įvykusio 2015 m. gruodžio mėn. 22 d. (protokolo Nr. BE-10-12) sprendimu pritarta biomedicininio tyrimo vykdymui.

Mokslinio eksperimento vykdytojai įsipareigoja: (1) nedelsiant informuoti Kauno Regioninį biomedicininio Tyrimų Etikos komitetą apie visus nenumatytus atvejus, susijusius su studijos vykdymu, (2) iki sausio 15 dienos – pateikti metinį studijos vykdymo apibendrinimą bei, (3) per mėnesį po studijos užbaigimo, pateikti galutinį pranešimą apie eksperimentą.

| Kauno regioninio biomedicininio tyrimų etikos komiteto nariai |                                |                             |                   |
|---------------------------------------------------------------|--------------------------------|-----------------------------|-------------------|
| Nr.                                                           | Vardas, Pavardė                | Veiklos sritis              | Dalyvavo posėdyje |
| 1.                                                            | Prof. Romaldas Mačiulaitis     | Klinikinė farmakologija     | taip              |
| 2.                                                            | Prof. Edgaras Stankevičius     | Fiziologija, farmakologija  | taip              |
| 3.                                                            | Doc. Eimantas Peičius          | Filosofija                  | taip              |
| 4.                                                            | Dr. Ramunė Kasperavičienė      | Kalbotyra                   | taip              |
| 5.                                                            | Med. dr. Jonas Andriuškevičius | Chirurgija                  | taip              |
| 6.                                                            | Agnė Krušinskaitė              | Teisė                       | taip              |
| 7.                                                            | Prof. Skaidrius Miliauskas     | Pulmonologija, vidaus ligos | taip              |
| 8.                                                            | Med. dr. Rokas Bagdonas        | Chirurgija                  | ne                |
| 9.                                                            | Eglė Vaižgelienė               | Visuomenės sveikata         | ne                |

Kauno regioninis biomedicininis tyrimų etikos komitetas dirba vadovaudamasis etikos principais nustatytais biomedicininio tyrimų Etikos įstatyme, Helsinkio deklaracijoje, vaistų tyrinėjimo Geros klinikinės praktikos taisyklėmis.

Pirmininkas

Prof. Romaldas Mačiulaitis

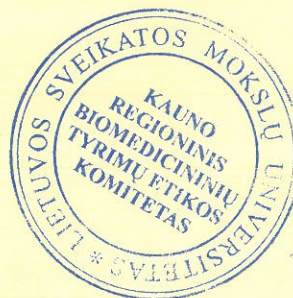

Supplement: s1 [file s1]
